# Supplementary material
Source: PubMed Central journal article supplement (PMC356977)
Supplement: pnas_0308649100_1.pdf [file pnas_0308649100_1.pdf]

**Table 3. Correlations (*r* values) between phenotypes among mice in the F<sub>1</sub> hybrids (top half, shaded) and backcross (bottom half)**

|                       | Total histology score | BUN   | Cholesterol | Albumin | Proteinuria | Composite score |
|-----------------------|-----------------------|-------|-------------|---------|-------------|-----------------|
| Total histology score |                       | 0.52  | 0.64        | -0.23   | 0.56        | 0.75            |
| BUN                   | 0.68                  |       | 0.54        | -0.15   | 0.36        | 0.78            |
| Cholesterol, mg/dl    | 0.76                  | 0.64  |             | -0.26   | 0.42        | 0.82            |
| Albumin, mg/dl        | -0.53                 | -0.39 | -0.42       |         | -0.33       | -0.11           |
| Proteinuria           | 0.6                   | 0.44  | 0.63        | -0.56   |             | 0.72            |
| Composite score       | 0.83                  | 0.75  | 0.87        | -0.07   | 0.8         |                 |

BUN, blood urea nitrogen.
